# Supplementary material for: Theranostic Au Cubic Nano-aggregates as Potential Photoacoustic Contrast and Photothermal Therapeutic Agents
Source: PubMed Central journal article supplement — Theranostics. 2014 Feb 25;4(5):534–45. doi: 10.7150/thno.8188 (PMC3966056; doi:10.7150/thno.8188), 2014-02-25
Supplement: thnov04p0534s1.pdf [file thnov04p0534s1.pdf]

# Theranostic Au Cubic Nano-aggregates as Potential Photoacoustic Contrast and Photothermal Therapeutic Agents

Juan Hu, Xianglong Zhu, Hui Li, Zhenghuan Zhao, Xiaoqin Chi, Guoming Huang, Dengtong Huang, Gang Liu, Xiaomin Wang, and Jinhao Gao\*

## Supporting Information

### Calculation of the molar extinction coefficient of Au-80 CNAs:

We assumed the Au CNAs as hollow nanocubes.

The volume of the nanoparticles (NPs):  $D^3 - d^3 = 1.69 \times 10^5 \text{ nm}^3$ , where  $D$  represents the outer edge length and  $d$  represents the inner edge length.

The number of Au atoms per nanoparticle is:  $\frac{\rho V}{M} \times N_A = 9.97 \times 10^6$ , where  $\rho$  is the density of the Au,  $V$  is the volume of the NPs,  $M$  is the molar mass of Au,  $N_A$  is the Avogadro constant.

The mass of per particle:  $9.97 \times 10^6 \times 197 = 1.97 \times 10^9$ .

The concentration of Au atoms determined by ICP-AES:  $c_{atom}$ .

The concentration of nanoparticles:  $c_{NPs} = \frac{c_{atom}}{\frac{\rho V}{M} \times N_A} = 3.82 \times 10^{-11} \text{ M}$ .

According to the Beer-Lambert law:  $A = \epsilon bc$ ,

The extinction coefficient:  $\epsilon = \frac{A}{bc} = 2.19 \times 10^{10} \text{ M}^{-1} \cdot \text{cm}^{-1}$ .

**Table S1.** Different reaction conditions for synthesizing Cu<sub>2</sub>O nanocubes with tunable sizes.

| 0.02 M<br>CuSO <sub>4</sub><br>(mL) | 0.05 M<br>mPEG-NH <sub>2</sub><br>( $\mu$ L) | molar ratio<br>(CuSO <sub>4</sub> :mPEG-NH <sub>2</sub> ) | 0.1 M<br>AA<br>(mL) | 0.5 M<br>NaOH<br>(mL) | Size<br>(nm) |
|-------------------------------------|----------------------------------------------|-----------------------------------------------------------|---------------------|-----------------------|--------------|
| 2                                   | 500                                          | 8:5                                                       | 1                   | 3                     | ~700         |
| 2                                   | 300                                          | 8:3                                                       | 1                   | 3                     | ~400         |
| 2                                   | 200                                          | 4:1                                                       | 1                   | 3                     | ~300         |
| 2                                   | 100                                          | 8:1                                                       | 1                   | 3                     | ~170         |
| 2                                   | 80                                           | 10:1                                                      | 1                   | 3                     | ~120         |
| 2                                   | 50                                           | 16:1                                                      | 1                   | 3                     | ~70          |

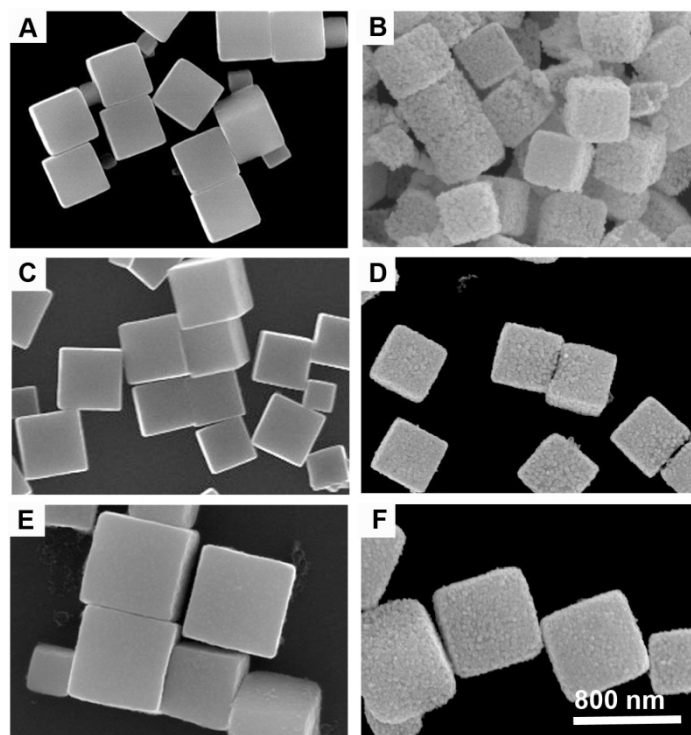

**Figure S1.** SEM images of Cu<sub>2</sub>O-300 (A), Cu<sub>2</sub>O-400 (C), Cu<sub>2</sub>O-700 (E) and corresponding Au-330 CNAs (B), Au-435 CNAs (D), and Au-750 CNAs (F), respectively. All images share the same scale bar.

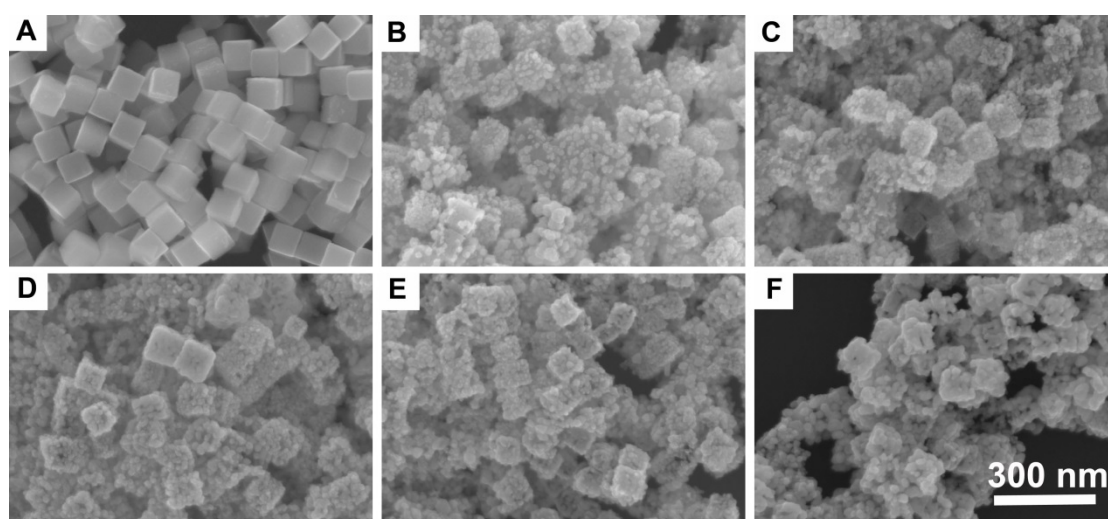

**Figure S2.** The SEM image of Cu<sub>2</sub>O-70 nanocubes (A) and Au CNAs (B-F) by varying the molar ratio of H[AuCl<sub>4</sub>] to Cu<sub>2</sub>O nanocubes. All images share the same scale bar.

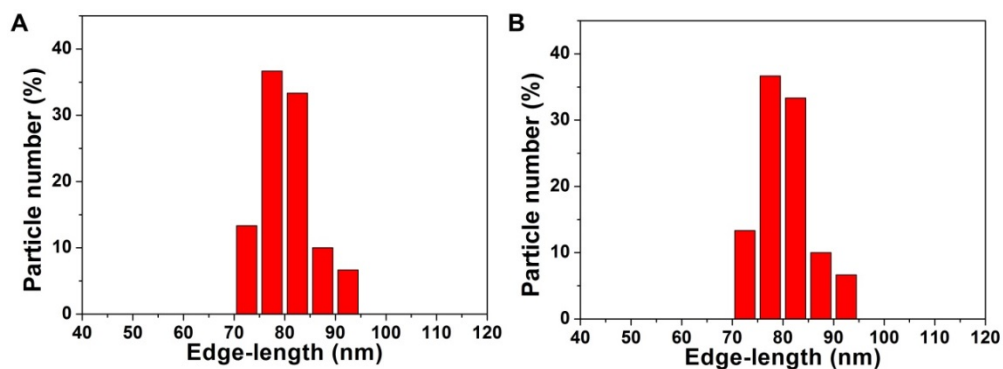

**Figure S3.** Size distributions of Cu<sub>2</sub>O-70 nanocubes (A) with  $70.03 \pm 4.09$  nm and Au-80 CNAs (B) with  $80.90 \pm 5.04$  nm in diameter, respectively.

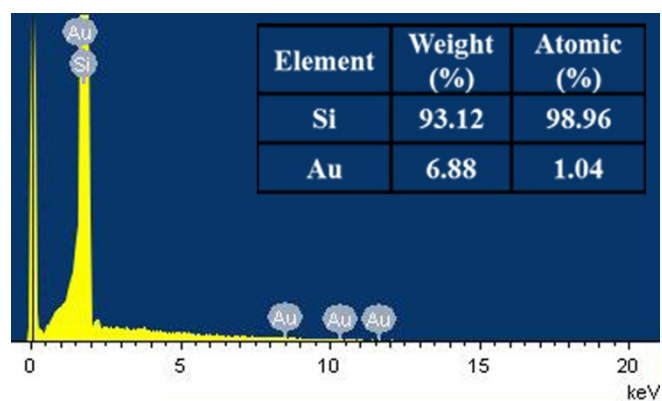

**Figure S4.** Elemental analysis of Au-80 CNAs on silicon wafer using energy dispersive X-ray spectrometry (EDS).

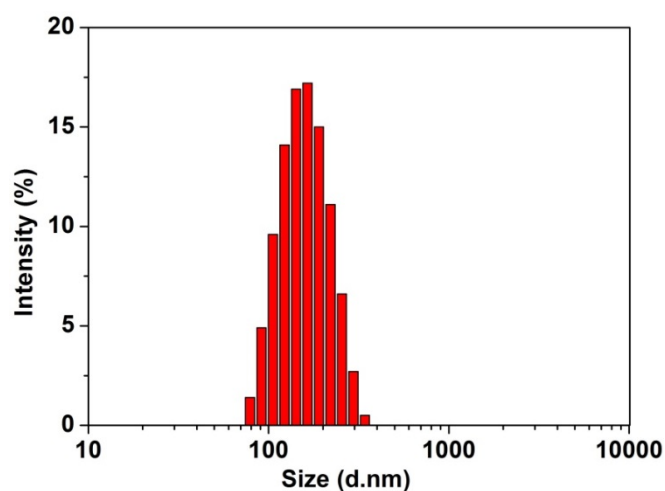

**Figure S5.** DLS shows hydrodynamic diameter of Au-80 CNAs.

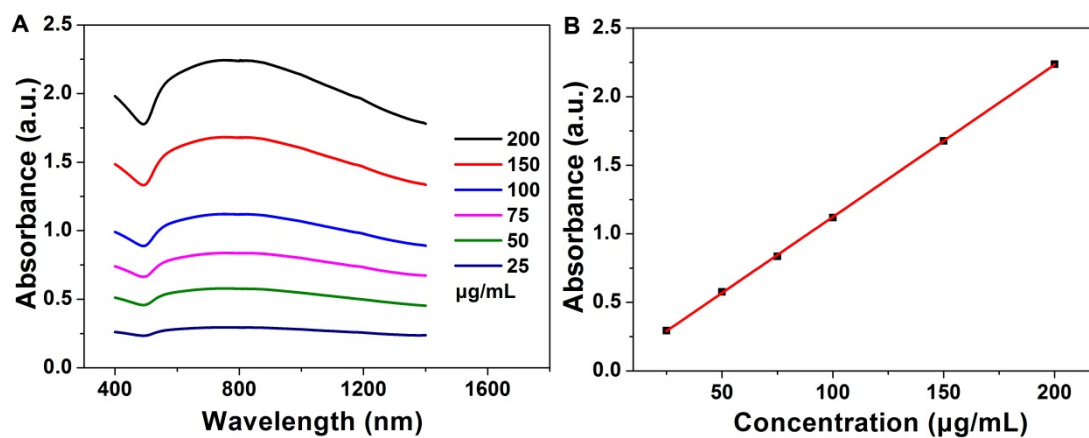

**Figure S6.** (A) Absorption spectra of Au-80 CNAs aqueous solutions with different concentrations. (B) A linear relationship for the absorbance at the wavelength of 808 nm as a function of the concentration.

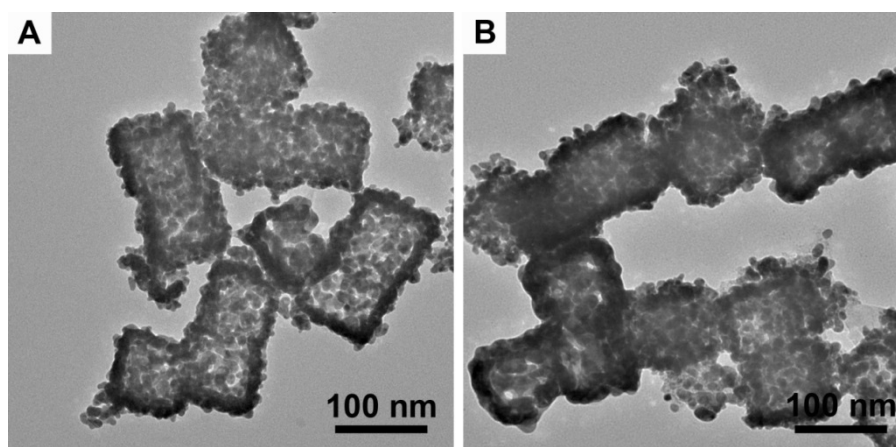

**Figure S7.** The TEM images of the Au CNAs in an aqueous solution before (A) and after (B) twice irradiation by the 808 nm laser at a power density of  $2 \text{ W/cm}^2$  for 10 min.

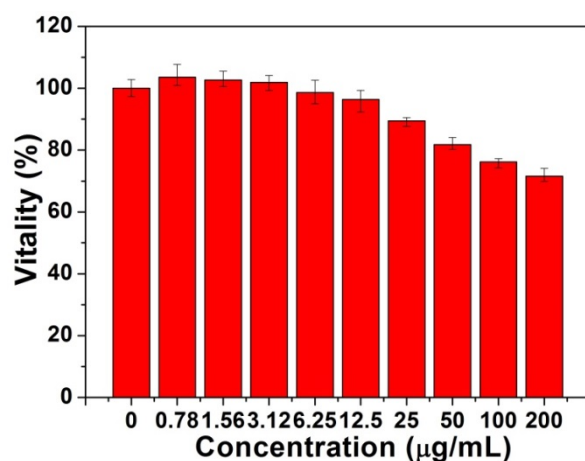

**Figure S8.** Cell vitality of Hep G2 cells after incubated with Au-80 CNAs nanoparticles with different Au concentrations at 37 °C for 24 h.

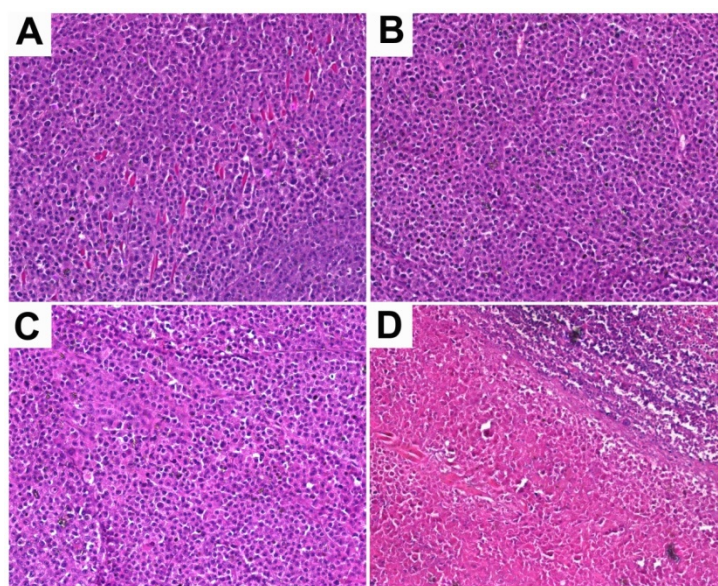

**Figure S9.** Representative Hematoxylin and eosin (H&E) staining histology images of tumor tissues from the mice after different treatments. (A) blank (no treatment); (B): laser only (exposed to 808 nm laser at 1 W/cm<sup>2</sup> for 5 min.); (C) Au-80 CNAs only (intratumorally injected with 120 µL of 200 µg/mL Au-80 CNAs); (D) Au-80 CNAs and laser co-treatment (intratumorally injected with 120 µL of 200 µg/mL Au-80 CNAs and then immediately exposed to 808 nm laser at 1 W/cm<sup>2</sup> for 5 min).

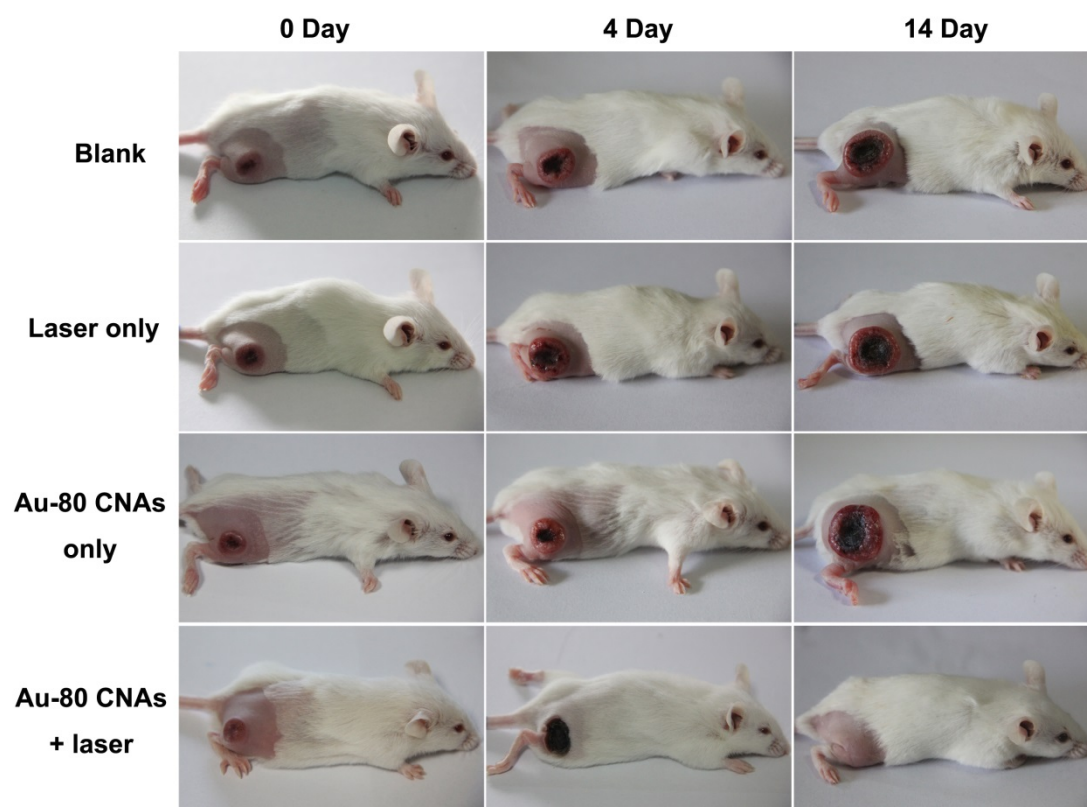

**Figure S10.** The digital photographs of S180 tumor-bearing mice taken at 0 day before treatments, 4 days and 14 days after treatments of different groups. Treatments: blank (no treatment); laser only (exposed to 808 nm laser at  $1 \text{ W/cm}^2$  for 5 min.); Au-80 CNAs only (intratumorally injected with  $120 \mu\text{L}$  of  $200 \mu\text{g/mL}$  Au-80 CNAs); Au-80 CNAs + laser (intratumorally injected with  $120 \mu\text{L}$  of  $200 \mu\text{g/mL}$  Au-80 CNAs and then immediately exposed to 808 nm laser at  $1 \text{ W/cm}^2$  for 5 min).
